# Supplementary material for: Preliminary evidence of the association between DNAm and orbital volumetry in GO
Source: PubMed Central journal article supplement — Endocr Connect. 2020 Jun 4;9(7):617–26. doi: 10.1530/EC-20-0147 (PMC7354721; doi:10.1530/ec-20-0147), 2020-06-04
Supplement: supplementary_table_1.pdf [file supplementary_table_1.pdf]

**Supplementary Table 1: DNA methylation levels of candidate genes in GO subjects ( $\times 10^2$ )**

|      | ANGEL1 | BECN1 | BOLL | CDK5 | IL17RE | LYAR | MBP  |
|------|--------|-------|------|------|--------|------|------|
| Mean | 0.70   | 0.66  | 1.29 | 1.15 | 2.00   | 0.91 | 4.85 |
| SD   | 0.61   | 0.15  | 0.67 | 1.30 | 0.56   | 0.59 | 2.14 |
